# Supplementary material for: A convenient chemo-enzymatic synthesis and 18F-labelling of both enantiomers of trans-1-toluenesulfonyloxymethyl-2-fluoromethyl-cyclopropane
Source: Royal Society of Chemistry journal article supplement (doi:10.1039/b812777h), 2008-01-01

## Electronic Supplementary Information

# A convenient chemo-enzymatic synthesis of both enantiomers of *trans*-1-toluenesulfonyloxymethyl-2-fluoromethyl-cyclopropane

Patrick Johannes Riss\*, Frank Rösch

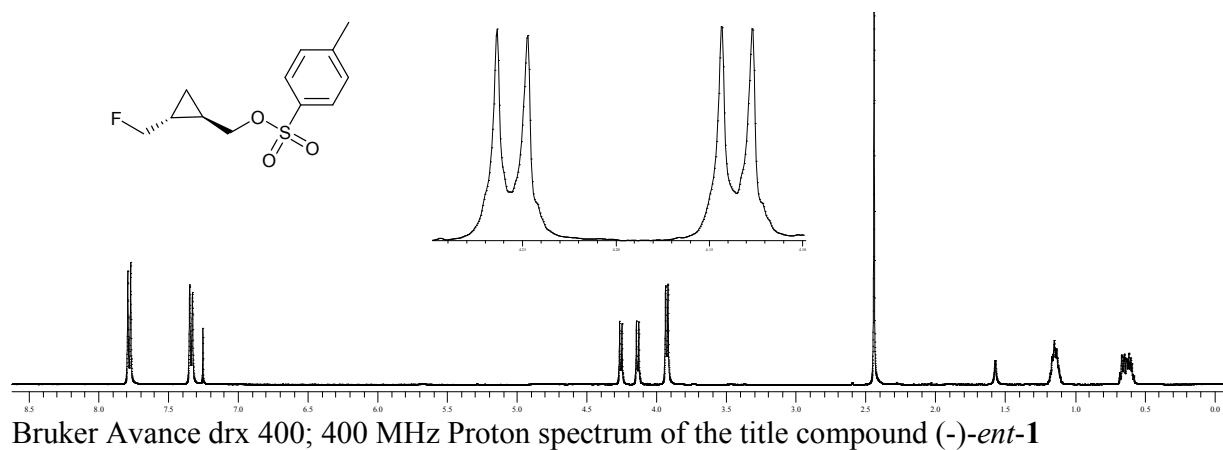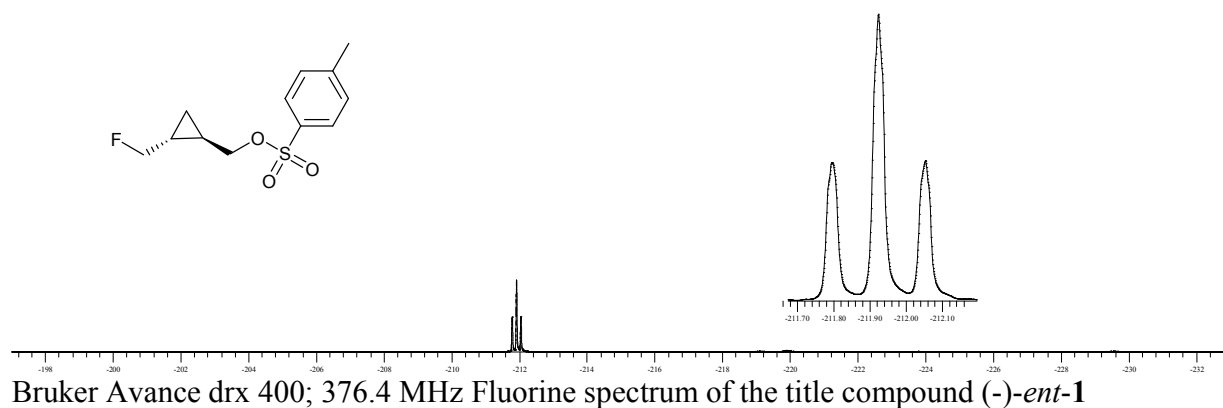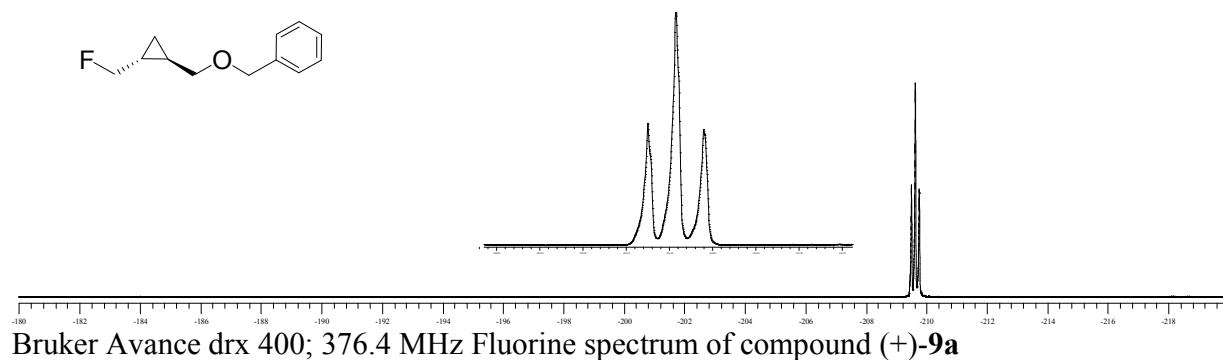

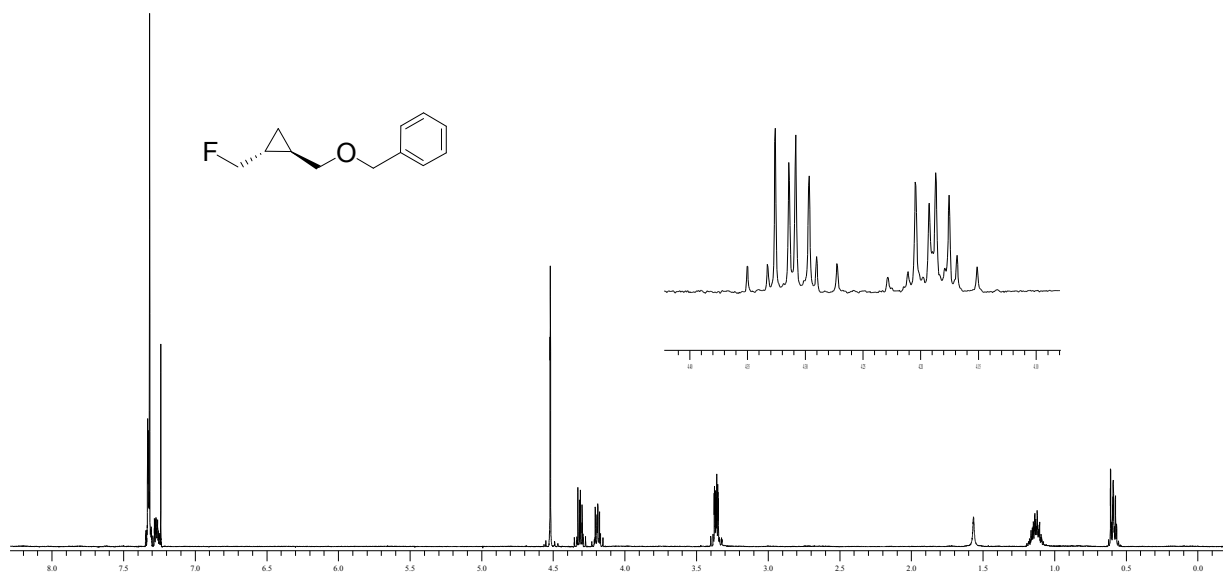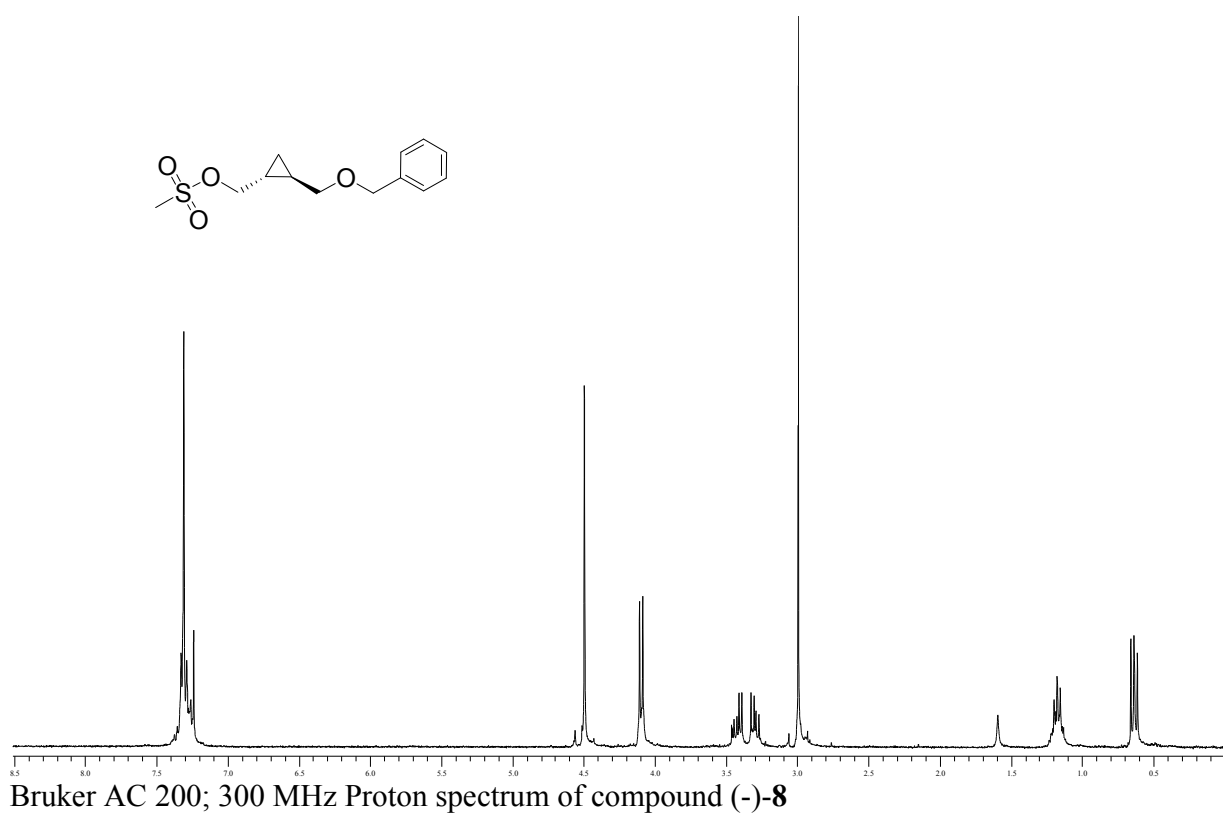

Supplement: b812777h.pdf [file b812777h.pdf]
